# Supplementary material for: Multiplex Staining by Sequential Immunostaining and Antibody Removal on Routine Tissue Sections
Source: PubMed Central journal article supplement — J Histochem Cytochem. 2017 Jul 10;65(8):431–44. doi: 10.1369/0022155417719419 (PMC5533273; doi:10.1369/0022155417719419), 2017-07-10
Supplement: JHC-17-0016.R2_Production_Supplemental_Data_online_supp___07-05-2017.pdf [file JHC-17-0016.R2_Production_Supplemental_Data_online_supp___07-05-2017.pdf]

## **SUPPLEMENTAL TABLE LEGENDS**

Supplemental Table 1: Primary antibodies

Supplemental Table 2: Secondary antibodies

Supplemental Table 3: Staining variability

The mean channel value  $\pm$  SD is shown for the number of replicas in the column “n”. Data are expressed also as % variation over 256 channels. The wavelength in which the variation is measured is also shown

## **SUPPLEMENTAL FIGURE LEGENDS**

Supplemental Fig. 1

A- Effect of incubation time on staining

The variation in intensity, measured as channel variation, after one hour (100%) and overnight (O/N) incubation is plotted.

B- Effect of double indirect vs single indirect staining of intensity.

The variation in intensity, measured as channel variation, after one (100%) or two rounds of indirect immunofluorescent staining are plotted.

C- Effect of mounting media on antigenicity.

Buffered 60% Glycerol as mounting medium has minimal or no effect on antigen preservation, compared to a polyvinyl alcohol or a Glycerol-Gelatin one. Antigen-retrieved sections were mounted with the media shown, immunostained and quantified. Values are % channel variations over the baseline (100%).

## Supplemental Fig. 2

### A- Tissue autofluorescence in four tissues.

Tissue autofluorescence was obtained by multiple exposure time in four tissues (placenta, kidney, skin and squamous epithelium) in each of four excitation/emission combinations. Mean fluorescence intensity (Y) is plotted against exposure time (milliseconds, X). Note the linear response.

B- A portion of a kidney biopsy stained for cytokeratin 8 was acquired with the AF (top) and with the FITC (middle, KER8+AF) specific filter sets. The AF image, corrected for the exposure factor, was subtracted from the cytokeratin image. The result is shown at the bottom, showing exclusively the specific staining (KER8). Note the absence of nuclear DAPI staining in the top image. Scale bar = 500  $\mu$ m.

C and D- Pixel-by-pixel comparison of AF values in placenta and kidney.

Comparison of the intensity values pixel by pixel are shown for the AF channel (420exc/530em) versus the FITC and the TRITC channels in placenta (left) and kidney (right). FITC vs TRITC comparison is also shown. Note in kidney the spread of the values for AF vs TRITC and for FITC vs TRITC.

E- Changes in autofluorescence before AR, after AR and after stripping (5 cycles).

Autofluorescence images were obtained from placenta sections, illuminating with the  $480 \pm 17$ nm filter and collecting with the triband dichroic and the  $520 \pm 28$ nm filter. WSI were acquired before AR, after AR and after five cycles-equivalent (2,5 hr) of 2ME/SDS stripping. The WSI were all registered and a 30,000 pixel selection placed in an excel file. Bivariate plot for PreAR-PostAR (red dots) and PostAR-PostStrip (black circles) are shown. Note the multiple pixel

populations with divergent AF before and after AR, while before and after stripping the vast majority of pixels line up along the middle of the bivariate graph.

F- Pixel-by-pixel comparison of AF values over 10 stripping cycles.

Comparison of AF values of kidney tubules (left) and an immune infiltrate (right) at time 0 (abscissa) and after 10 cycles (ordinate) shows an overall reduced AF values in the immune cells and a greater variation of the pre- and post-values in kidney tubules.

Supplementary Fig. 3

A- Channel intensity for six markers and six negative controls over ten staining and stripping 2ME/SDS.

One single section for every three markers was stained (t0), sequentially stripped with the 2ME/SDS method and re-stained alternatively with a negative control antibody or for the same markers 10 times. Staining intensity variation is expressed as a box plot. Note the separation of the negative controls from the positive stains. CD3 and Pax5 in FITC, bcl-2 and CD79a in TRITC, CD20 and CD44 in Cy5. Primary Ab incubation time: 1 hr, 2nd Ab: 30 min, single indirect IF.

B- Channel variations for individual antibody pools over stripping.

Percent variations from the t0 channel position over 256 channels for each three-antibody pool at each stripping cycle with the buffers listed on top of each column.

C- Variation of the positive pixel area for ten stripping cycles.

The positive pixel area, expressed as percentage of the area analyzed, over ten staining and stripping cycles is depicted for GnHCl (blue boxes), 2ME/SD (red boxes) and DAB-stained serial

sections (black boxes). Note the overlap of the results over the three methods for most, but not all antigens.

#### Supplemental Fig. 4

Variability for nine markers over ten staining and stripping  $\text{GnHCl}$ , 6Murea, no AR cycles.

One single section for every three markers was stained ( $t_0$ ) and sequentially stripped and re-stained for the same markers 10 times. Variation in staining intensity is expressed as fraction of the 256 8bit channels over the initial staining intensity. Primary Ab incubation time: 1 hr, 2nd Ab: 30 min, single indirect IF. Note the decrease below the baseline value for all the markers tested.

#### Supplemental Fig. 5

A, B- Effect of 26mM  $\text{NaBH}_4$  in EtOH 95% and Tris Buffer 0.05M pH 9.

$\text{NaBH}_4$  causes changes in AF when applied at 1 mg/ml (26mM) in 95% EtOH (A) or in buffer pH9 (B). The reduction at 30 min in buffer is a  $\text{NaBH}_4$ -specific degradation of the section.

Changes in AF in three filter combos are expressed as % over 256 channels.

C- Effect of 15mM  $\text{NaBH}_4$  in EtOH 95% and Tris Buffer 0.05M pH 9 on AF.

A  $\text{NaBH}_4$  specific effect is seen in EtOH at 10 min and disappears at 30 min. The reduction at 30 min in buffer is a  $\text{NaBH}_4$ -specific degradation of the section.

$\text{NaBH}_4$  is applied at 15mM in 95% EtOH or in buffer pH9. An equivalent amount of NaOH, the diluent, is applied as a comparison. The reduction at 30 min in buffer is a  $\text{NaBH}_4$ -specific degradation of the section. Changes in AF in three filter combos are expressed as % over 256 channels.

Suppl.Fig 6

Residual anti-intermediate filaments (keratins 8 and 19, Vimentin) primary antibodies after GnHCl and 2ME/SDS stripping

Selected high-power fields are shown from a kidney section stained for rabbit anti Keratin 8, mouse IgG2a anti Keratin 19 and mouse IgG1 anti Vimentin, before (top, control) and after stripping. Note that the control images are unmodified, acquired with the exposure time selected. The stripped images instead, taken with the same setting, have been modified with the automatic increase in brightness and contrast of the ImageJ software (Maximum value <20, Brightness ~ -10)

SUPPLEMENTAL TABLE 1

| Name                                  | clone                   | Isotype   | cat n.               | Source                                                    | Concentr   | Dilution |
|---------------------------------------|-------------------------|-----------|----------------------|-----------------------------------------------------------|------------|----------|
| BCL-2                                 | Bcl-2-100               | IgG1      | B3170-.2ML           | Sigma Aldrich                                             | 5,1 mg/ml  | 1 µg/ml  |
| BCL6                                  | BCL6 (N3)               | Rb Ab     | sc-858               | SCBT                                                      | 200 µg/ml  | 1 µg/ml  |
| BCL6                                  | LN22                    | IgG2b     | MS-1936-S0           | Thermo                                                    | supn       | 1:100    |
| Blimp-1                               | 6D3                     | rat IgG2a | sc-47732             | SCBT                                                      | 1 mg/ml    | 1 µg/ml  |
| C-MAF                                 | M-153                   | Rb Ab     | sc-7866              | SCBT                                                      | 200 µg/ml  | 1 µg/ml  |
| CD10                                  | NCL-CD10-L-270          | IgG1      |                      | Leica-Microsystem/<br>Novocastra                          | 30 µg/ml   | 1 µg/ml  |
| CD123                                 | NCL-L-CD123             | IgG2b     |                      | Leica-Microsystem/<br>Novocastra                          | 90 µg/ml   | 1:100    |
| CD138                                 | MI15                    | IgG1      | MA5-12400            | Thermo                                                    | supn       | 1:100    |
| CD14                                  | HPA002127               | Rb Ab     | HPA002127            | Sigma Aldrich                                             | 400 µg/ml  | 1 µg/ml  |
| CD141 /<br>Thrombomoduli<br>n         | EPR4051                 | Rb Mab    | 2927-1<br>ab109189   | Abcam/Epitomics                                           | unknown    | 1:200    |
| CD141 /<br>Thrombomoduli<br>n         | D-3                     | IgG2a     | sc-13164             | SCBT<br><a href="#">Leica-Microsystem/<br/>Novocastra</a> | 200 µg/ml  | 1 µg/ml  |
| CD16<br>CD163<br>(Macrophages,<br>M2) | 2H7                     | IgG2a     | NCL-CD16             |                                                           | unknown    | 1:100    |
| CD1a                                  | 10D6                    | IgG1      | MA5-11458            | Thermo                                                    | 100 µg/ml  | 1:100    |
| CD1c                                  | EP3622                  | Rb Mab    | ab108309             | Abcam/Epitomics                                           | supn       | 1:200    |
| CD20                                  | UMAB46                  | IgG1      | UM500042             | Origene                                                   | 2,48mg/ml  | 1 µg/ml  |
| CD21                                  | L26                     | IgG2a     | sc-58985             | SCBT                                                      | 200 µg/ml  | 1 µg/ml  |
| CD27/<br>TNFRSF7                      | 1F8                     | IgG1      | MA1-27120            | Thermo                                                    | 100 µg/ml  | 1 µg/ml  |
| CD271 (NGF-R<br>p75)                  | EPR8569                 | Rb Mab    | ab131254             | Abcam/Epitomics                                           | 1450 µg/ml | 1 µg/ml  |
| CD271 (NGF-R<br>p75)                  | EP1039Y                 | Rb Mab    | 1812-1               | Abcam/Epitomics                                           | unknown    | 1:2000   |
| CD30                                  | NGFR 5                  | IgG1      | MS-394-Px            | <a href="#">Neomarkers</a>                                | 200 µg/ml  | 1 µg/ml  |
| CD34                                  | CON6D/ C2               | IgG2a     | MA5-12632            | Thermo                                                    | 200 µg/ml  | 1 µg/ml  |
| CD3e                                  | EP373Y                  | Rb Mab    | 2150-1               | Abcam/Epitomics                                           | unknown    | 1:200    |
| CD4                                   | Rb Ab                   | Rb Ab     | C7930-.2ML           | Sigma Aldrich                                             | unknown    | 1:500    |
| CD43                                  | EPR6855                 | Rb Mab    | ab133616             | Abcam/Epitomics                                           | 140 µg/ml  | 1:200    |
| CD44                                  | DF-T1                   | IgG1      | sc-6256              | SCBT                                                      | 200 µg/ml  | 1 µg/ml  |
| CD44                                  | 156-3C11                | IgG2a     | MS-668-Px            | <a href="#">Neomarkers</a>                                | 200        | 1:500    |
| CD45                                  | poly                    | Rb Ab     | HPA005785            | <a href="#">Sigma Aldrich</a>                             | 190 µg/ml  | 1 µg/ml  |
| CD45                                  | EP322Y                  | Rb Mab    | 1691-1               | Abcam/Epitomics                                           | unknown    | 1:50     |
| CD45RB                                | Bra-55<br>PD7/26 CD45RB | IgG1      | MS-240 - P0          | <a href="#">Thermo</a>                                    | 200 µg/ml  | 1 µg/ml  |
| CD45RB                                | Ab-3                    | IgG1      | MS-1846-P0           | <a href="#">Thermo</a>                                    | 200 µg/ml  | 1 µg/ml  |
| CD56 (N-CAM)                          | 123C3.D5                | IgG1      | sc-7326              | <a href="#">SCBT</a>                                      | 200 µg/ml  | 1 µg/ml  |
| CD68                                  | KP1                     | IgG1      | sc-20060             | SCBT                                                      | 200 µg/ml  | 1 µg/ml  |
| CD69                                  |                         | Rb Ab     | HPA050525            | Sigma Aldrich                                             | 50 µg/ml   | 1:100    |
| CD7                                   | CBC.37                  | IgG2b     | M7255                | Dako                                                      | 47 µg/ml   | 1 µg/ml  |
| CD7                                   | SP94                    | Rb Mab    | SAB5500071-<br>100UL | Sigma Aldrich                                             | unknown    | 1:100    |

|                            |                                                                                     |        |                                   |                               |            |         |
|----------------------------|-------------------------------------------------------------------------------------|--------|-----------------------------------|-------------------------------|------------|---------|
| CD79a                      | JCB117                                                                              | IgG1   | sc-53209                          | SCBT                          | 200 µg/ml  | 1 µg/ml |
| CD79a                      | HM47                                                                                | IgG1   | sc-53209-<br>SAB4700229-<br>100UG | Sigma Aldrich                 | 1mg/ml     | 1 µg/ml |
| CD8                        | F5                                                                                  | IgG2a  | sc-25277                          | SCBT                          | 200 µg/ml  | 1 µg/ml |
| CD8                        | C8/144B                                                                             | IgG1   | sc-53212                          | SCBT                          | 200 µg/ml  | 1 µg/ml |
| Cleaved<br>Caspase 3       | Cleaved<br>Caspase-3<br>(Asp175)                                                    | Rb Ab  | #9661                             | CST                           | unknown    | 1:200   |
| Cleaved<br>Caspase 8       | Cleaved<br>Caspase-8<br>(Asp391) (18C8)<br>Cleaved PARP<br>(Asp214)<br>(D64E10) XP® | Rb Mab | #9496                             | CST                           | unknown    | 1:200   |
| Cleaved PARP               | Rabbit mAb                                                                          | Rb Mab | #5625                             | CST                           | unknown    | 1:200   |
| CLEC10A / CD301            |                                                                                     | Rb Ab  | HPA021937                         | Sigma Aldrich                 | 200 µg/ml  | 1 µg/ml |
| CLEC9A /<br>CD370          | 14N8D7                                                                              | IgG1   | MA5-16262                         | Thermo                        | 500 µg/ml  | 1 µg/ml |
| CTNNB1                     |                                                                                     | IgG1   | 610154                            | <a href="#">BD Pharmingen</a> | 250 µg/ml  | 1:300   |
| CXCL13                     | 53610                                                                               | IgG1   | MAB801-100                        | R&D                           | 500 µg/ml  | 1:100   |
| Cytokeratin Abs            | Cytokeratin 8<br>(1E8)                                                              | IgG2a  | sc-58736                          | SCBT                          | 200 µg/ml  | 1 µg/ml |
| Cytokeratin Abs            | Cytokeratin 19<br>(A53-B/A2)                                                        | IgG2a  | sc-6278                           | SCBT                          | 200 µg/ml  | 1 µg/ml |
| Cytokeratin Abs            | Cytokeratin 19                                                                      | Rb Ab  | HPA002465-<br>100UL               | Sigma Aldrich                 | 200 µg/ml  | 1 µg/ml |
| Cytokeratin Abs            | Cytokeratin 8                                                                       | Rb Ab  | HPA049866-<br>100µl               | Sigma Aldrich                 | 50 µg/ml   | 1 µg/ml |
| E-cadherin                 | 4A2C7                                                                               | IgG1   |                                   | <a href="#">BD Pharmingen</a> | 250 µg/ml  | 1 µg/ml |
| E2-2/TCF4                  | 6H5-3                                                                               | IgG2a  | T5817                             | Sigma Aldrich                 | 1mg/ml     | 1 µg/ml |
| E2A/E47/TCF3               | N-649                                                                               | Rb Ab  | sc-763                            | SCBT                          | 200 µg/ml  | 1 µg/ml |
| Estrogen<br>Receptor Alpha | 1D5                                                                                 | IgG1   | sc-56833                          | Dako                          | 166 µg/ml  | 1:100   |
| Estrogen Receptor          | Alpha                                                                               | Rb Ab  | HPA000449                         | Sigma Aldrich                 | 80 µg/ml   | 1 µg/ml |
| Foxp3                      | FOXP3 antibody<br>[236A/E7]                                                         | IgG1   | ab20034                           | Abcam/Epitomics               | 1000 µg/ml | 1 µg/ml |
| gH2AX                      | rb Mab                                                                              | Rb Mab | #9718                             | <a href="#">CST</a>           | ND         | 1:200   |
| gH2AX                      | JBW301 IgG1                                                                         | IgG1   | 05-636                            | <a href="#">Millipore</a>     | 1000 µg/ml | 1 µg/ml |
| Granzyme B                 | GRB7                                                                                | IgG2a  | sc-73620                          | SCBT                          | supn       | 1:500   |
| HLA-A                      | EMR8-5                                                                              | IgG1   | ab70328                           | Abcam/Epitomics               | 1000 µg/ml | 1 µg/ml |
| HLA-DR                     | SPM289                                                                              | IgG2b  |                                   | Abcam/Epitomics               | 200 µg/ml  | 1 µg/ml |
| ID1                        | BCH-1/195-14                                                                        | Rb Mab | 50 µg (BCH-<br>1/195-14-50)       | Biocheck                      | 1000 µg/ml | 1 µg/ml |
| ID2                        | BCH-3/9-2-8                                                                         | Rb Mab | 50 µg (BCH-3/9-<br>2-8-50)        | Biocheck                      | 500 µg/ml  | 1 µg/ml |
| ID3                        | BCH-4/17-3                                                                          | Rb Mab | 50 µg (BCH-<br>4/17-3-50)         | Biocheck                      | 1000 µg/ml | 1 µg/ml |
| IRF4                       | EP5699                                                                              | Rb Mab | 5391-1                            | Abcam/Epitomics               | unknown    | 1:500   |
| IRF4                       | IRF-4 (M-17)                                                                        | goat   | ab133590                          | SCBT                          | 100 µg/ml  | 1 µg/ml |
| IRF4                       |                                                                                     | Rb Ab  | sc-6059                           |                               |            |         |
| IRF8                       |                                                                                     | Rb Ab  | HPA002038-<br>100UL               | Sigma Aldrich                 | 100 µg/ml  | 1 µg/ml |
| IRF8                       | E-9                                                                                 | IgG2b  | sc-365042                         | SCBT                          | 200 µg/ml  | 1 µg/ml |
| ITF                        | H-425                                                                               | Rb Ab  | HPA002531                         | Sigma Aldrich                 | 100 µg/ml  | 1:200   |
|                            |                                                                                     | IgG1   | sc-81954                          | SCBT                          | 100 µg/ml  | 1:500   |

|                          |                               |           |                         |                                  |                  |         |
|--------------------------|-------------------------------|-----------|-------------------------|----------------------------------|------------------|---------|
| Ki-67                    | SP6                           | Rb Mab    | RM-9106 -<br>S0/S1/S    | <a href="#">Neomarkers</a>       | unknown          | 1:100   |
| Ki-67                    | UMAB107                       | IgG2a     | UMAB107                 | OriGene                          | 1mg/ml           | 2 µg/ml |
| Ki-67                    | 8D5                           | IgG1      | SAB5300425<br>AMAB91251 | Sigma Aldrich                    | unknown          | 1:500   |
| Lamin B1                 | CL3929                        | IgG1      | Sigma                   | Sigma Aldrich                    | 1000 µg/ml       | 1 µg/ml |
| Langerin / CD207         |                               | Rb Ab     | HPA011216               | Sigma Aldrich                    | 100 µg/ml        | 1 µg/ml |
| MCM5                     | E-10                          | IgG2b     | sc-165994               | SCBT                             | 200 µg/ml        | 1 µg/ml |
| MYC                      | Y69                           | Rb Mab    | 1472-1                  | Abcam/Epitomics                  | unknown          | 1:200   |
| MYC                      | c-Myc (N-262)                 | Rb Ab     | sc-764                  | SCBT                             | 200 µg/ml        | 1 µg/ml |
| p16 CDKN2A               | F-12                          | IgG2a     | sc-1661                 | <a href="#">SCBT</a>             | 200 µg/ml        | 1 µg/ml |
| p16 CDKN2A               | JC8                           | IgG2a     | sc-56330                | <a href="#">SCBT</a>             | 200 µg/ml        | 1 µg/ml |
| p21                      | EA10                          | IgG1      | OP64-20UG               | <a href="#">Merck</a>            | 100 µg/ml        | 1 µg/ml |
| p27 CDKN1B               | Ab-1(Clone DCS-<br>72.F6)     | IgG1      | MS-256-P0, 1, -         | <a href="#">Neomarkers</a>       | 200 µg/ml        | 1 µg/ml |
| p27 CDKN1B               | Rb poly C-term                | Rb Ab     | RB-9019-Px              | <a href="#">Neomarkers</a>       | 200 µg/ml        | 1 µg/ml |
| p57, Kip2                | C-20                          | Rb Ab     | sc-1040                 | SCBT                             | 200 µg/ml        | 1:200   |
| Pax5                     | DAK-Pax5                      | IgG1      | M7307                   | DAKO                             | 157 µg/ml        | 1 µg/ml |
| Pax5                     | 1EW                           | IgG1      | NCL-L-Pax5              | Leica-Microsystem/<br>Novocastra | supn             | 1:20    |
| Pax5                     | A-11                          | IgG2a     | sc-13146<br>05-1573 EMD | SCBT                             | 100 µg/ml        | 1 µg/ml |
| Pax5                     | 1H9                           | rat IgG2a | Millipore               | <a href="#">Sigma Aldrich</a>    | 100 µg/ml        | 1 µg/ml |
| Pax5                     | SP34                          | Rb Mab    | MA5-16389               | <a href="#">Thermo</a>           | unknown          | 1:50    |
| PD-1 / CD279             | UMAB197                       | IgG2a     | UMAB197                 | Origene                          | 1000 µg/ml       | 1 µg/ml |
| PD-L1(B7-H1,<br>CD274)   | Anti-PD-L1<br>antibody [28-8] | Rb Mab    | ab205921                | Abcam/Epitomics                  | 1192 µg/ml       | 1 µg/ml |
| Progesterone<br>Receptor | 636                           | IgG1      |                         | Dako                             | 54 µg/ml         | 1 µg/ml |
| S-100 alpha<br>chain     | 4C4.9 - biotin<br>conjugate   | IgG2a     | MA5-12966               | Thermo                           | 200 µg/ml        | 1 µg/ml |
| S-100 β chain            | N-15                          | goat      | sc-7852                 | SCBT                             | 200 µg/ml        | 1 µg/ml |
| Serpin B9 / PI9          | PI-9-17                       | IgG1      | sc-57531                | SCBT                             | supn             | 1:200   |
| TCR beta                 | G-11                          | IgG1      | sc-5277                 | SCBT                             | 200 µg/ml        | 1 µg/ml |
| TCR delta                | H-41                          | IgG1      | sc-100289               | SCBT                             | 100 µg/ml        | 1 µg/ml |
| TP53                     | DO-7                          | IgG2b     |                         | Dako                             | 137 µg/ml<br>156 | 1 µg/ml |
| Vimentin                 | V9                            | IgG1      |                         | Dako                             | µg/ml            | 1 µg/ml |
| ZEB1                     |                               | Rb Ab     | HPA027524               | Sigma Aldrich                    | 200 µg/ml        | 1 µg/ml |



SUPPLEMENTAL TABLE 2

| Host | Target | Reagent                                             | Absorbed             | cat n.      | ditta          |
|------|--------|-----------------------------------------------------|----------------------|-------------|----------------|
| Dk   | Rb     | Donkey Anti-Rabbit IgG (H+L) DyLight 488            | Multi                | 711-545-152 | Jackson        |
| Gt   | Rb     | Goat Anti-Rabbit IgG (H+L) Alexa Fluor® 488         | Hu, Mo, Rt           | 111-545-144 | Immunoresearch |
| Dk   | Mouse  | Donkey anti Mouse Ig - DyLight 488                  | Multi (not rat)      | 715-485-150 | Jackson        |
| Gt   | Mouse  | Goat Anti-Mouse IgG (H+L) Alexa Fluor® 488          | Hu, Bov, Hrs, Rb, Rt | 115-545-166 | Immunoresearch |
| Gt   | IgG1   | Goat Anti-Mouse IgG1 Alexa Fluor 488                | Hu, Bov, Rb          | 115-545-205 | Jackson        |
| Gt   | IgG2a  | Goat Anti-Mouse IgG2a ATTO488                       | Hu, Bov, Rb          | 610-152-041 | Rocklan        |
| Gt   | IgG2a  | Goat Anti-Mouse IgG2a Alexa Fluor® 488              | Hu, Bov, Rb          | 115-545-206 | Jackson        |
| Dk   | Gt     | Donkey Anti-Goat IgG (H+L) Alexa Fluor® 488         | Multi                | 705-545-147 | Jackson        |
| Dk   | Rb     | Donkey anti Rabbit Ig - DyLight 549                 | Multi                | 711-505-152 | Immunoresearch |
| Dk   | Rb     | Donkey Anti-Rabbit IgG (H+L) Rhodamine Red™-X (RRX) | Multi                | 711-295-152 | Jackson        |
| Gt   | Rb     | Goat Anti-Rabbit IgG (H+L) Rhodamine Red™-X (RRX)   | Hu, Mo, Rt           | 111-295-144 | Jackson        |
| Dk   | Mouse  | Donkey Anti-Mouse IgG (H+L) Rhodamine Red™-X (RRX)  | Multi                | 715-295-150 | Immunoresearch |
| Gt   | Mouse  | Goat Anti-Mouse IgG (H+L) Rhodamine Red™-X (RRX)    | Hu, Bov, Hrs, Rb, Rt | 115-295-166 | Jackson        |
| Gt   | IgG1   | Goat Anti-Mouse IgG1 Rhodamine Red™-X (RRX)         | Hu, Bov, Rb          | 115-295-205 | Jackson        |
| Gt   | IgG2a  | Goat Anti-Mouse IgG2a Rhodamine Red™-X (RRX)        | Hu, Bov, Rb          | 115-295-206 | Jackson        |
| Gt   | IgG2b  | Goat Anti-Mouse IgG2b Rhodamine Red™-X (RRX)        | Hu, Bov, Rb          | 115-295-207 | Jackson        |
| Gt   | IgG3   | Goat Anti-Mouse IgG3 Rhodamine Red™-X (RRX)         | Hu, Bov, Rb          | 115-295-209 | Jackson        |
| Gt   | Rat    | Goat Anti-Rat IgG (H+L) Rhodamine Red™-X (RRX)      | Hu, Bov, Hrs, Ms, Rb | 112-295-167 | Jackson        |
| Dk   | Gt     | Donkey Anti-Goat IgG (H+L) Alexa Fluor® 660         | Multi                | A21083      | Invitroge      |
| Dk   | Rb     | Donkey Anti-Rb IgG (H+L) Alexa Fluor® 680           | Multi                | A10043      | Invitroge      |
| Gt   | Rb     | Goat anti Rabbit IgG (H&L) ATTO 647N                | Multi                | 611-156-122 | Rocklan        |
| Gt   | Mouse  | Goat Anti-Mouse IgG (H+L) Alexa Fluor® 660          | Multi                | A21055      | Invitroge      |
| Dk   | Mouse  | Donkey Anti-Mouse IgG (H+L) Alexa Fluor® 647        | Multi                | 715-605-151 | Jackson        |
| Gt   | IgG1   | Goat Anti-Mouse IgG1 Alexa Fluor® 680               | Hu, Bov, Rb          | A31562      | Invitroge      |
| Gt   | IgG1   | Goat Anti-Mouse IgG1 Alexa Fluor® 647               | Hu, Bov, Rb          | 115-605-205 | Jackson        |
| Gt   | IgG2a  | Gt a Mouse IgG2a Alexa Fluor® 647                   | Hu, Bov, Rb          | 115-605-206 | Jackson        |

|     |       |                                            |             |             |                        |
|-----|-------|--------------------------------------------|-------------|-------------|------------------------|
| Gt  | IgG2b | Goat Anti-Mouse IgG2b Alexa Fluor® 647     | Hu, Bov, Rb | 115-605-207 | Jackson Immunoresearch |
| Dk  | Rat   | Donkey Anti-Rat IgG (H+L) Alexa Fluor® 647 | Multi       | 712-605-153 | Jackson Immunoresearch |
| Mou |       | Mouse Gamma Globulin 10mg                  |             | 015-000-002 | Jackson Immunoresearch |
| se  |       |                                            |             | 011-000-002 | Jackson Immunoresearch |
| Rb  |       | Rabbit Gamma Globulin 10 mg                |             |             |                        |

Abso  
rbed:  
Multi

Supplemental Table 3

|         | Mean channel value | $\pm$ SD | n | fraction of 256 ch | wavelength measured |
|---------|--------------------|----------|---|--------------------|---------------------|
| bcl-2   | 18.3               | 7.8      | 3 | 3.0%               | TRITC               |
| CD20    | 28.0               | 2.6      | 3 | 1.0%               | Cy5                 |
| CD3     | 6.3                | 2.3      | 3 | 0.9%               | FITC                |
| CD44    | 26.0               | 1.4      | 2 | 0.5%               | Cy5                 |
| CD79a   | 30.0               | 0.0      | 2 | 0.0%               | TRITC               |
| IRF4    | 6.3                | 2.1      | 3 | 0.8%               | FITC                |
| Ker19   | 80.3               | 31.4     | 6 | 12.3%              | Cy5                 |
| Ker8    | 93.5               | 21.4     | 6 | 8.4%               | FITC                |
| MIB1    | 16.0               | 1.0      | 3 | 0.4%               | TRITC               |
| Pax5    | 7.5                | 0.7      | 2 | 0.3%               | FITC                |
| Vim     | 152.5              | 16.3     | 6 | 6.4%               | TRITC               |
| average |                    |          |   | 3.1%               |                     |

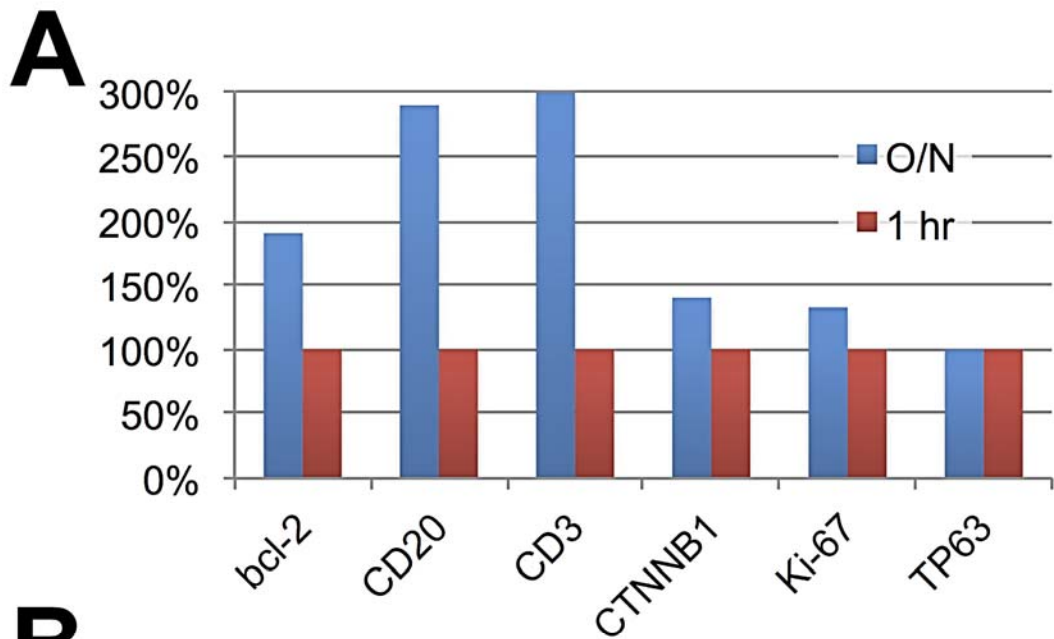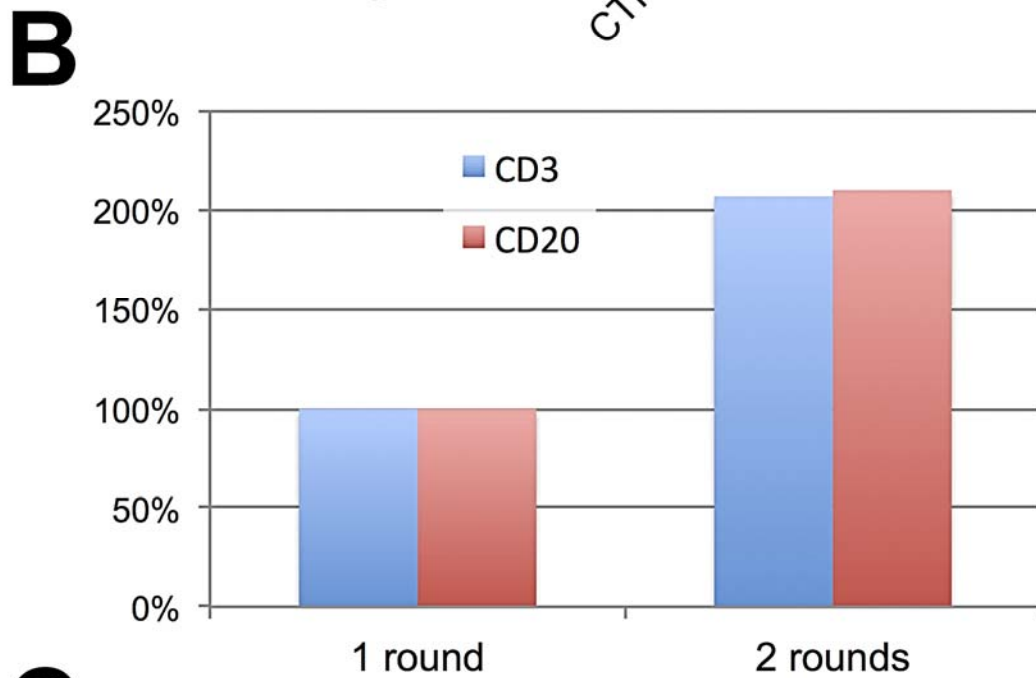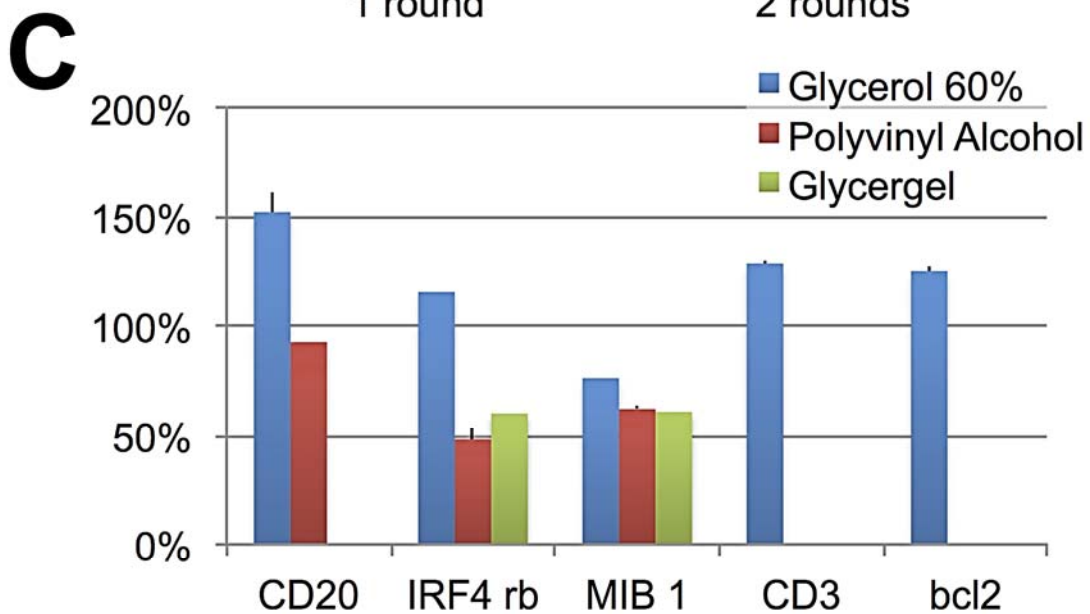

Supplemental Figure 1

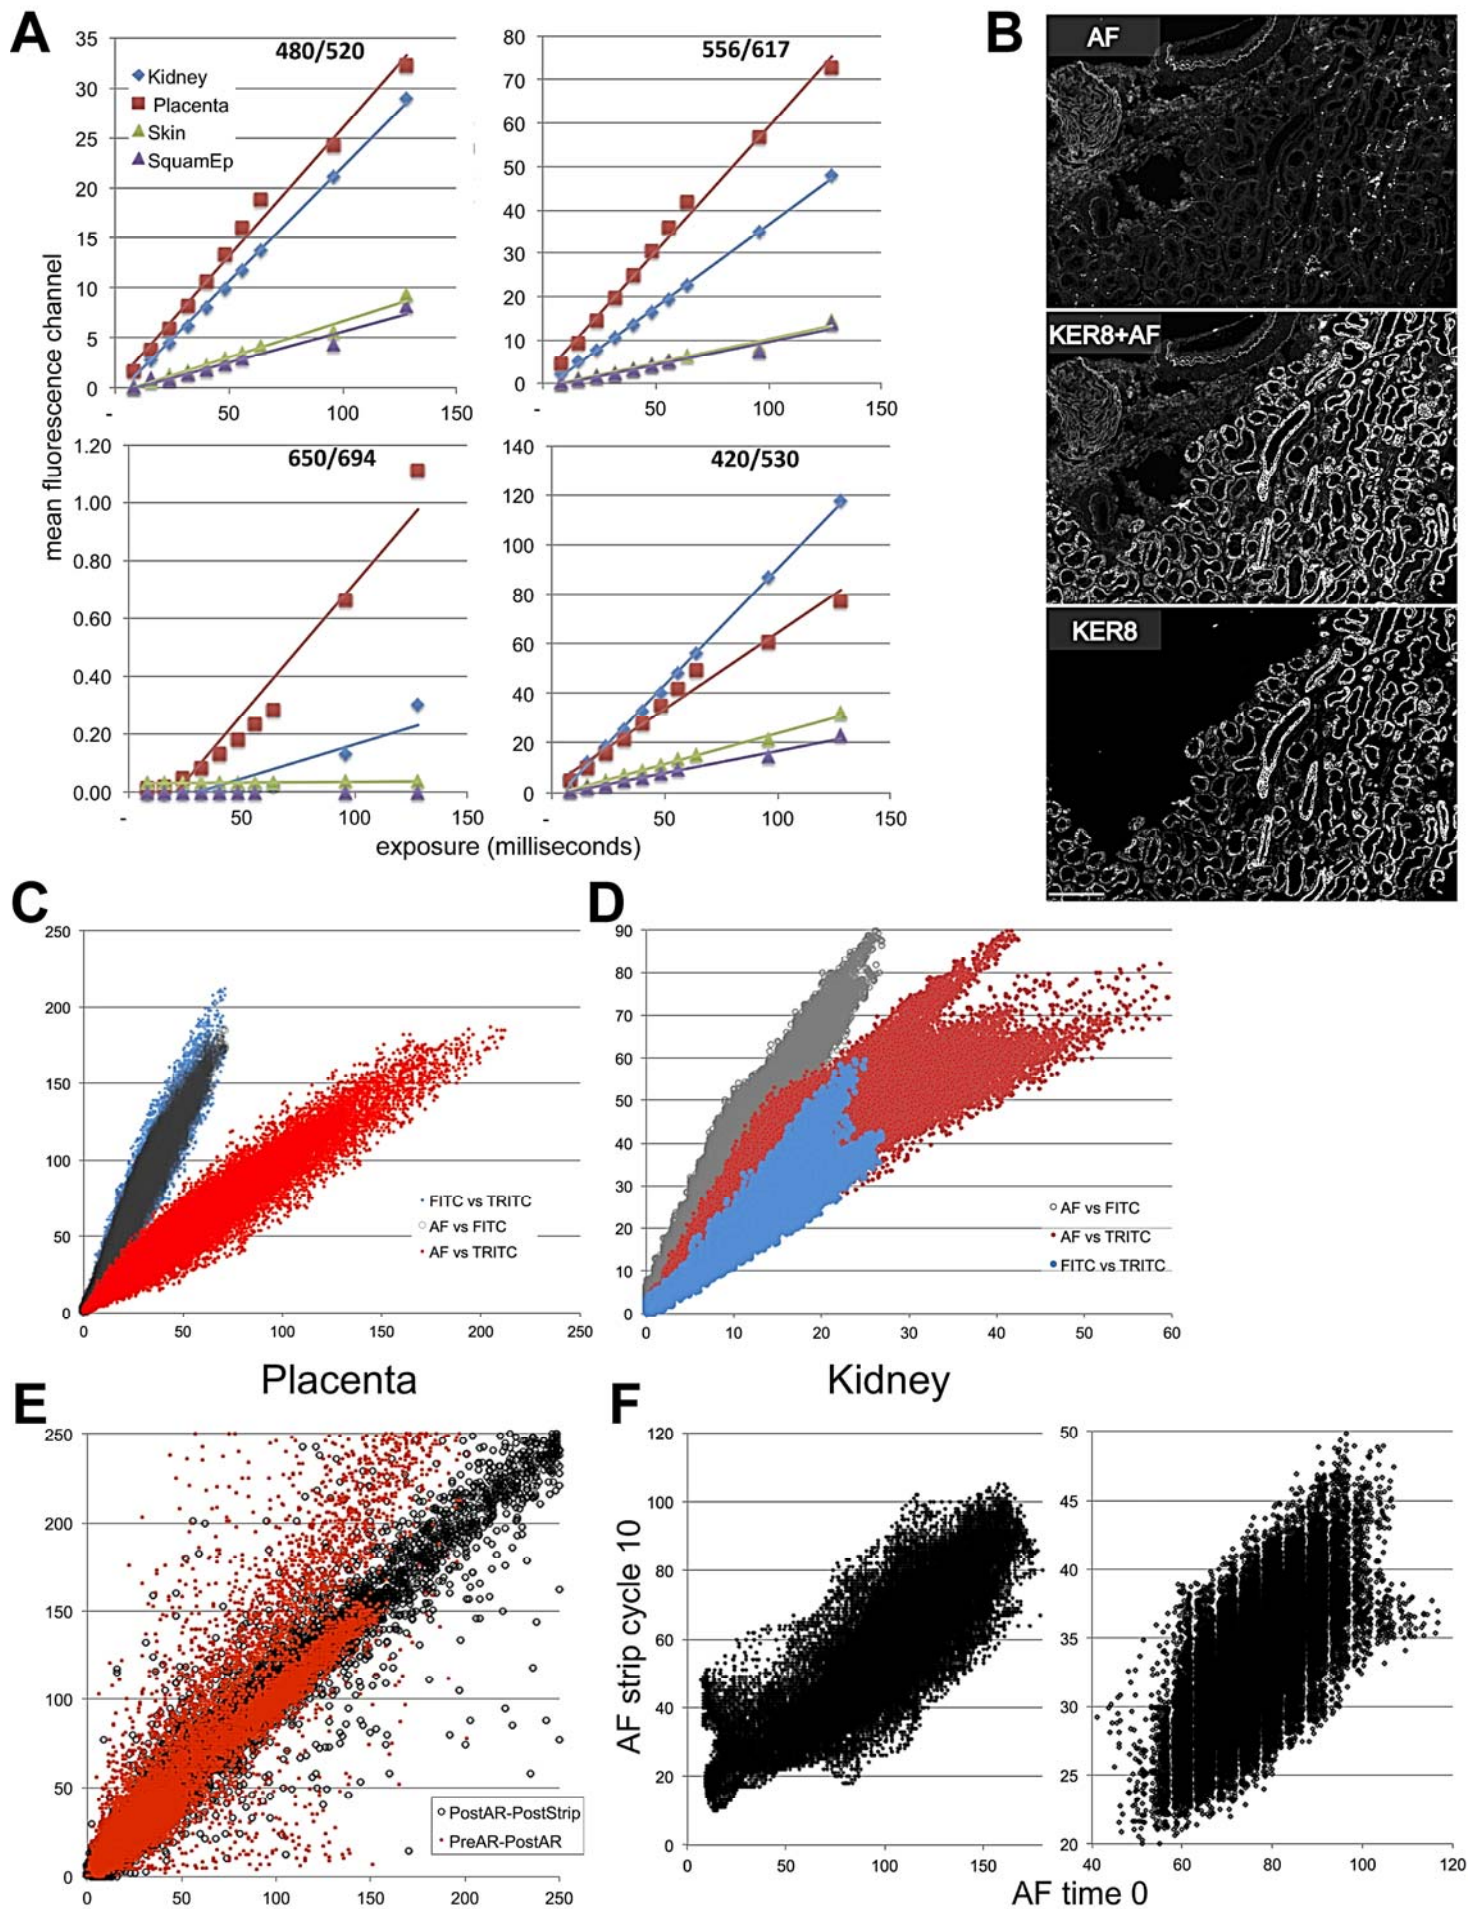

Supplemental Figure 2

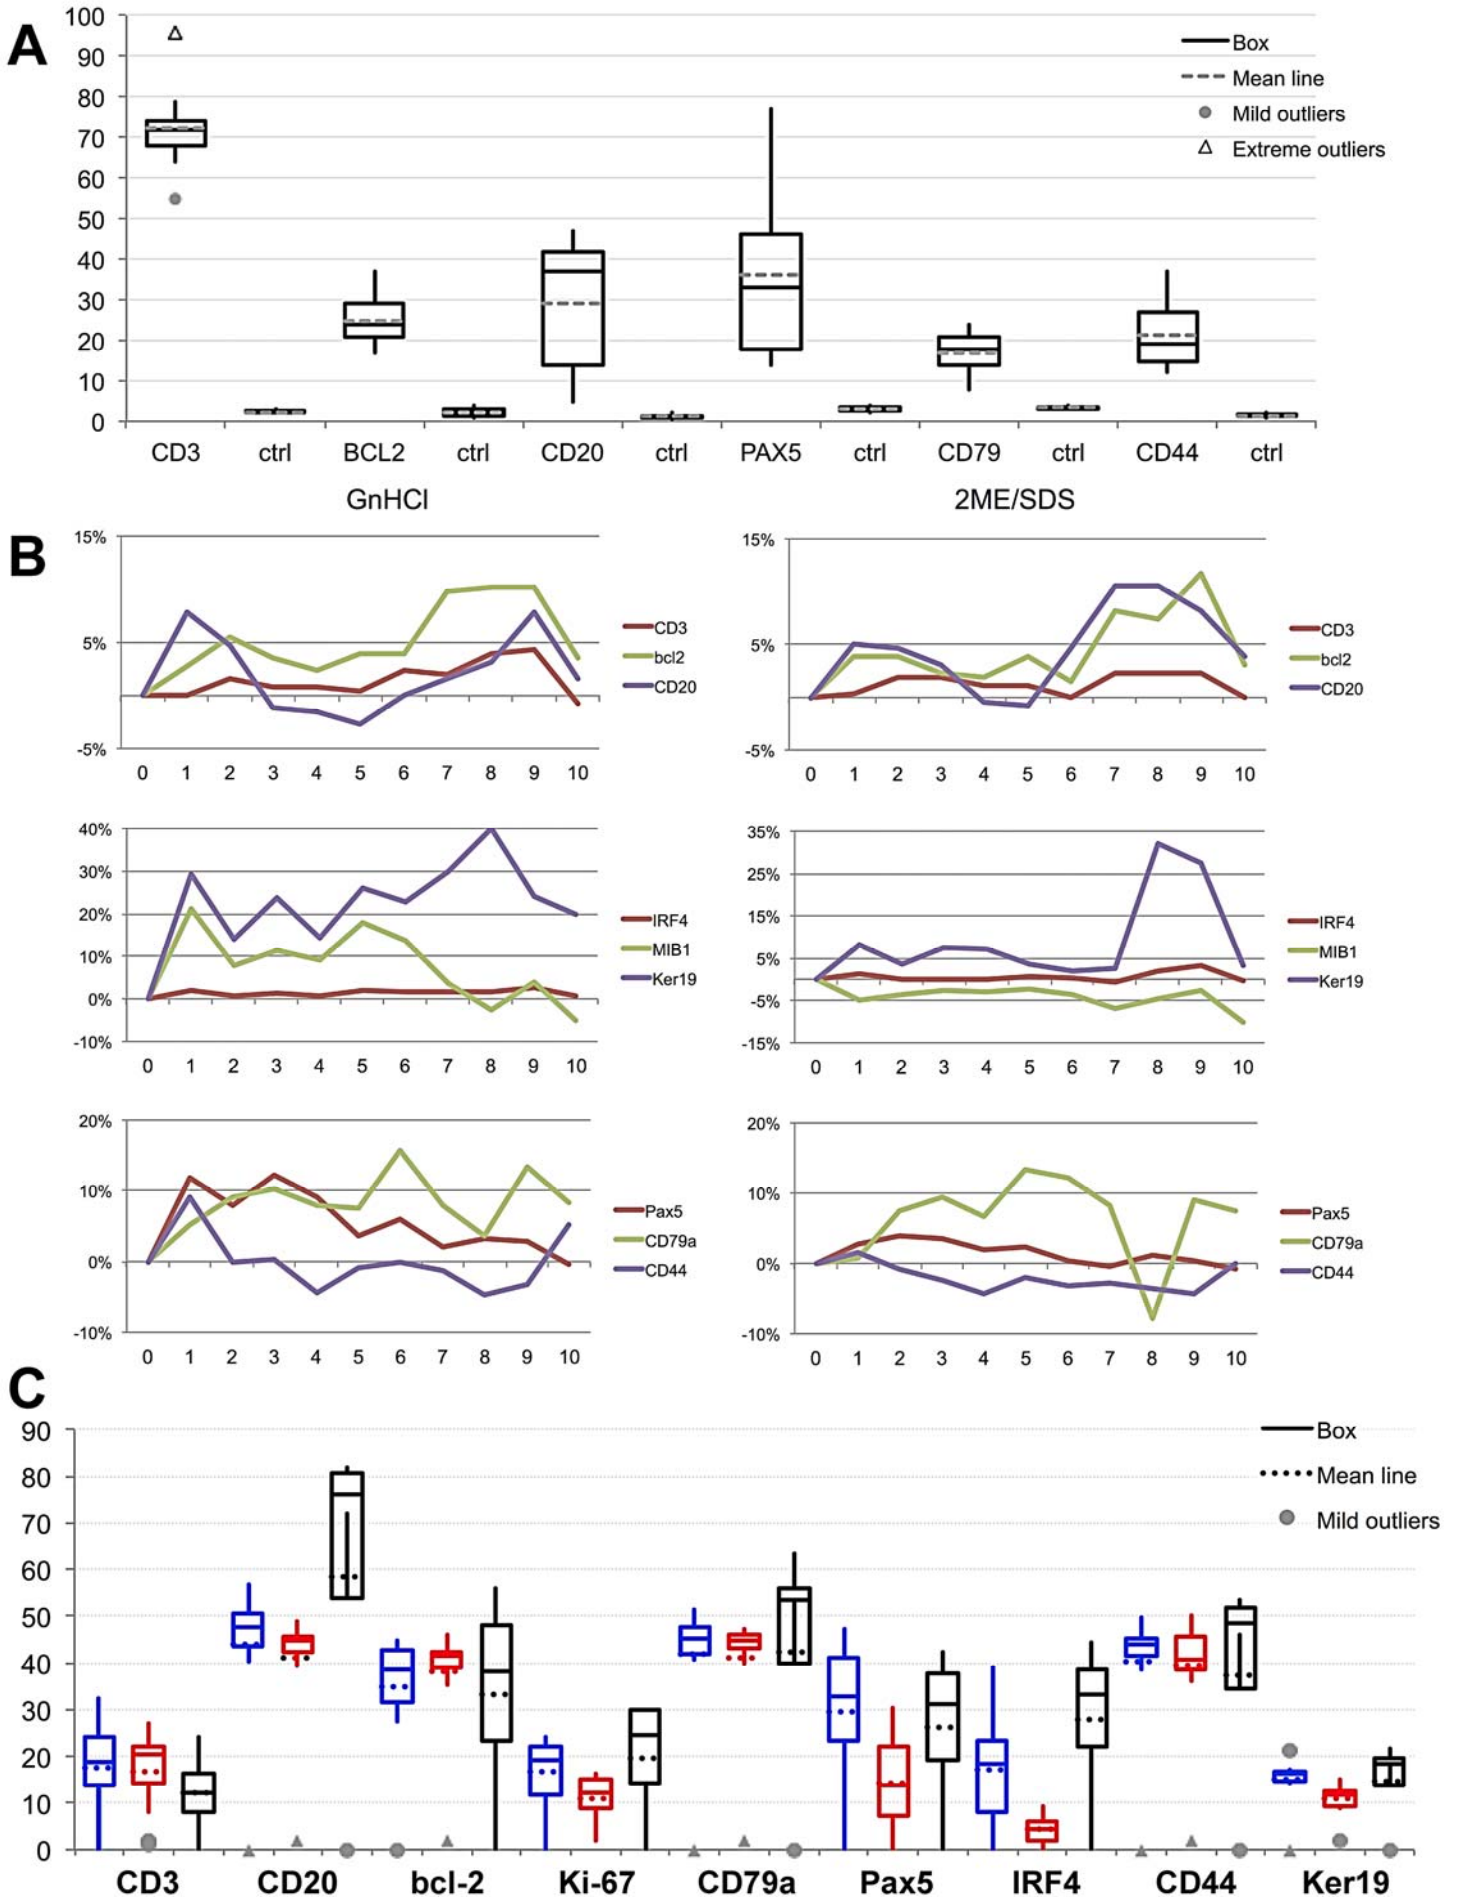

Supplemental Figure 3

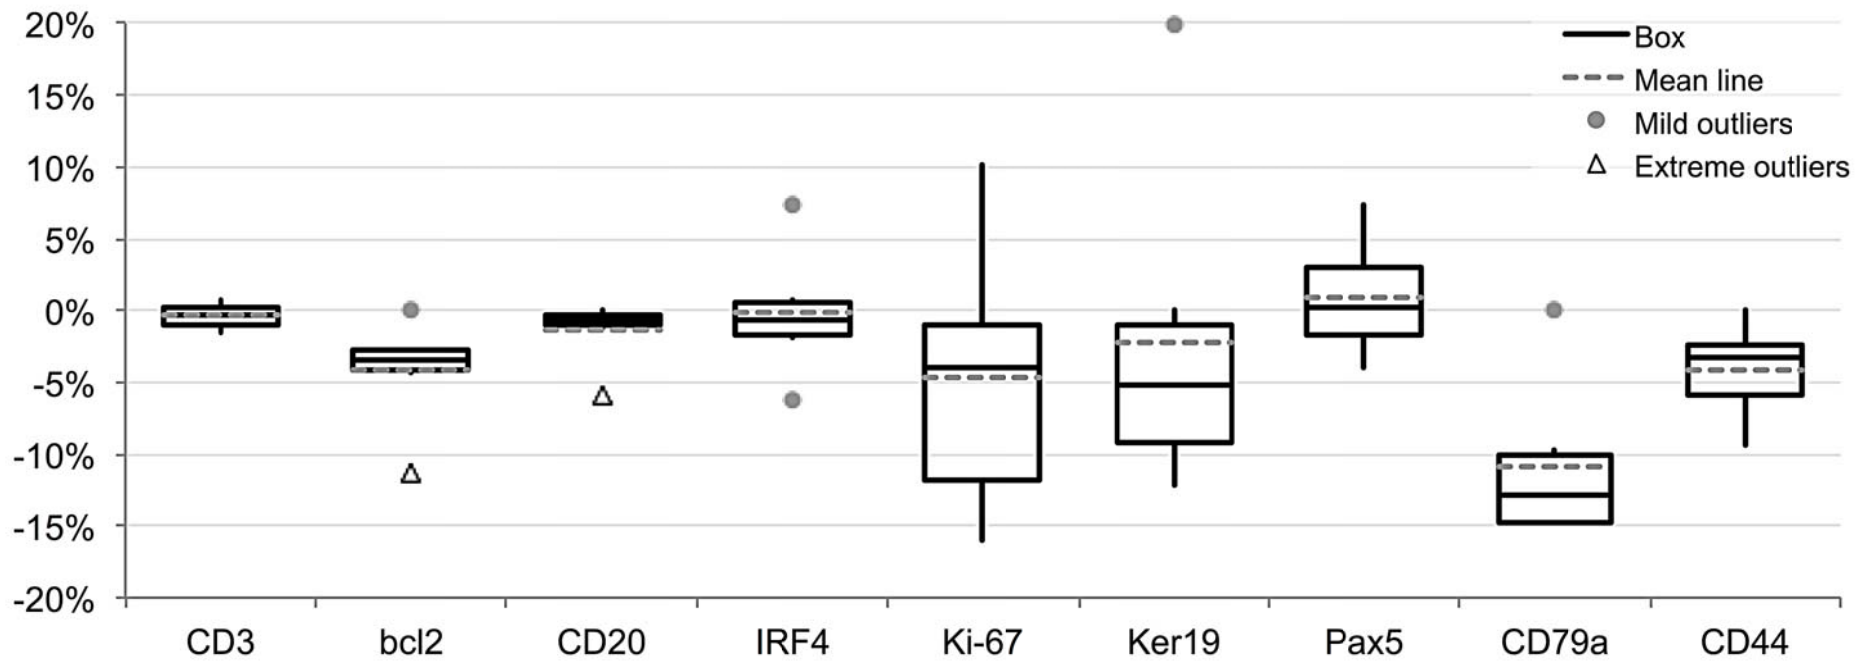

Supplemental Figure 4

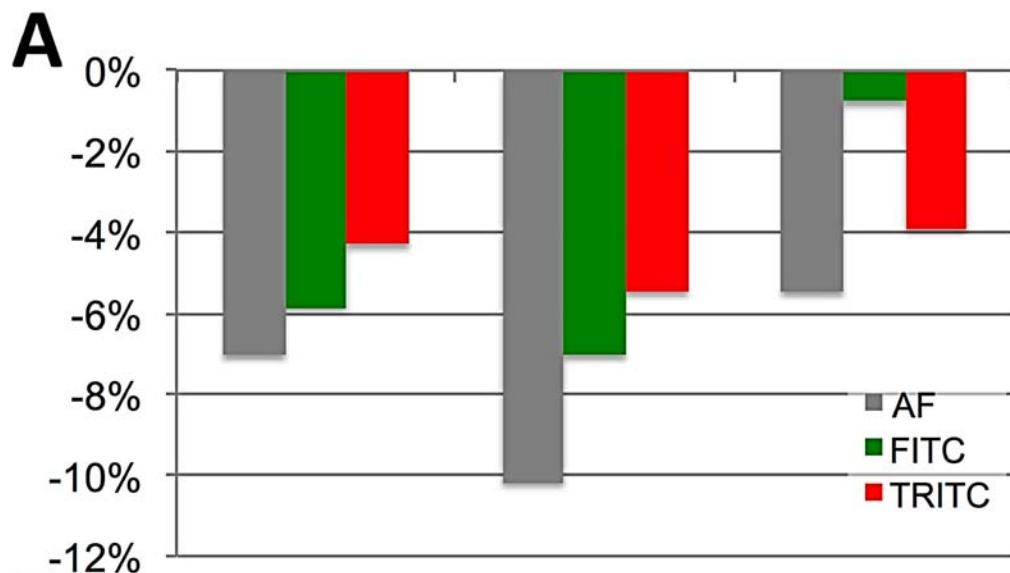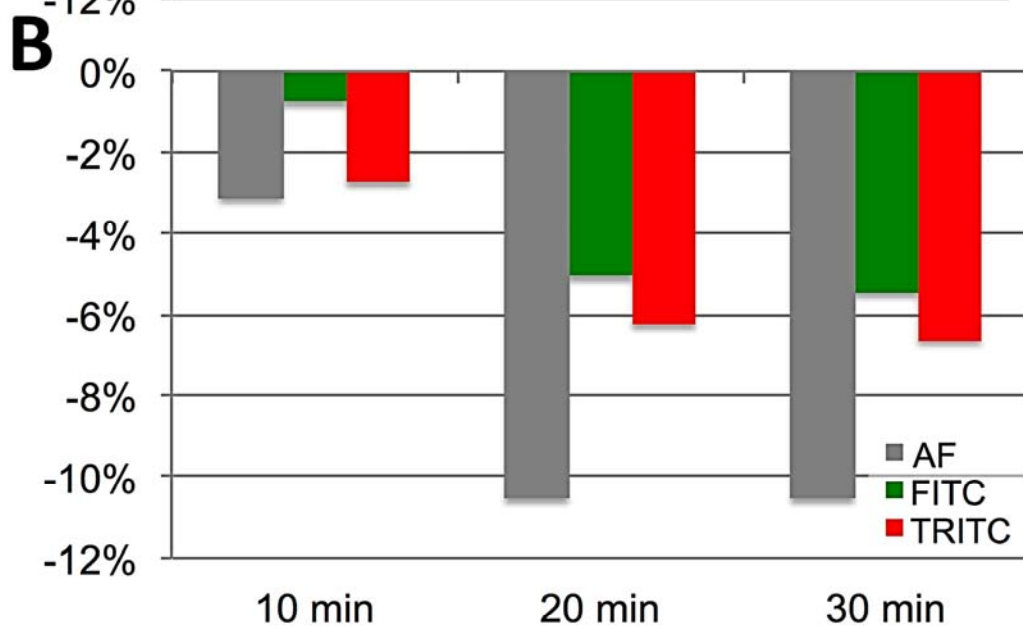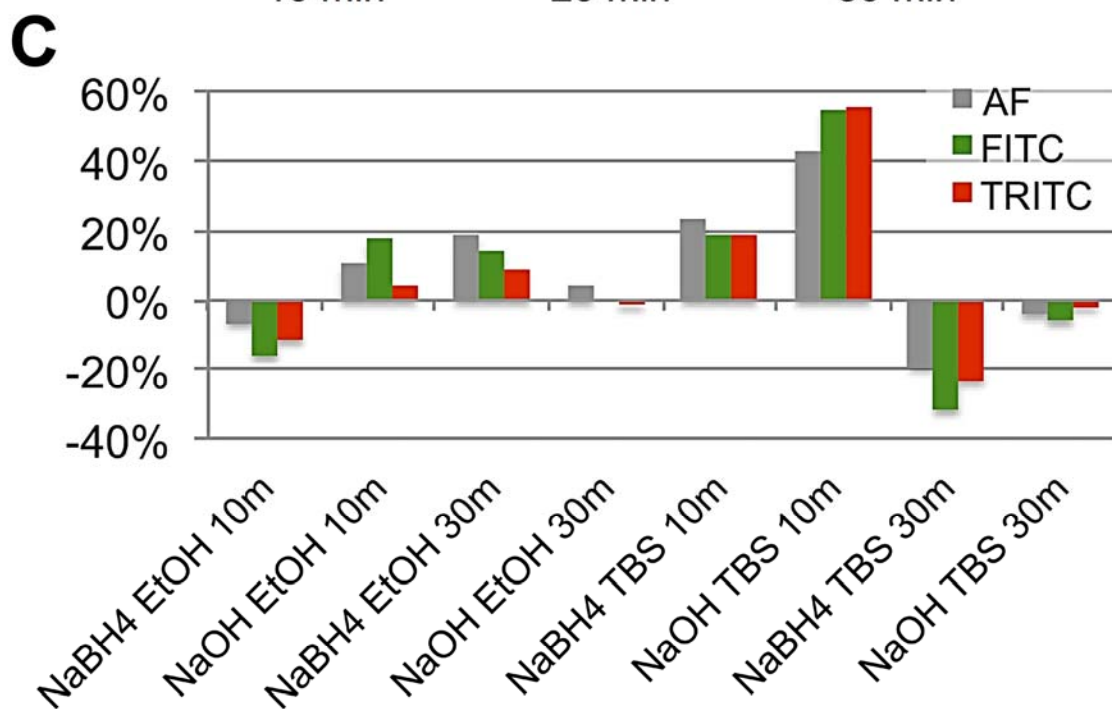

Supplemental Figure 5



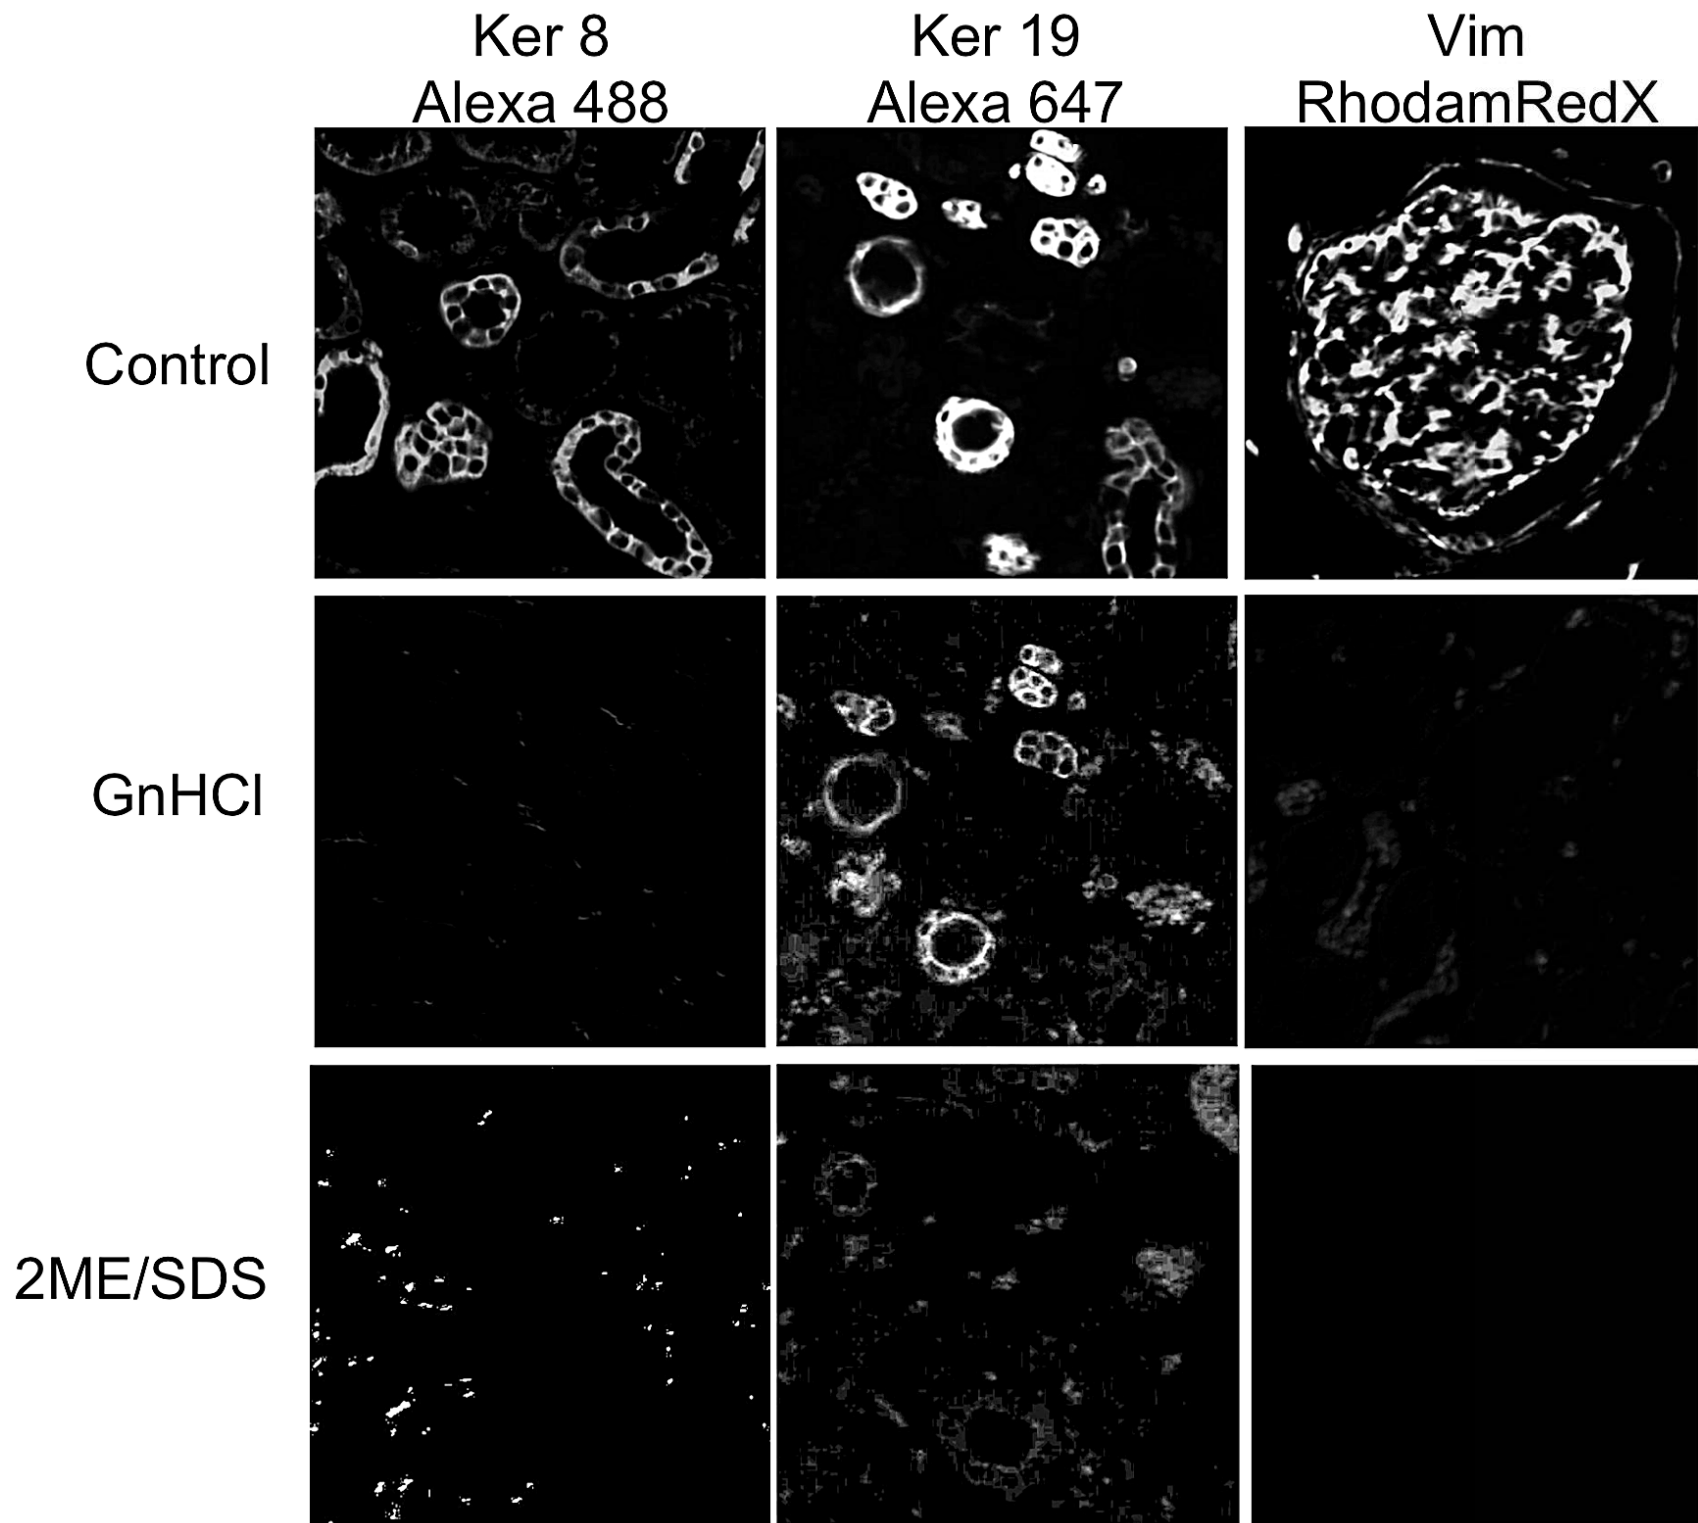

Supplemental Figure 6
